# Supplementary material for: Transcriptional Response of Silkworm (Bombyx mori) Eggs to O2 or HCl Treatment
Source: MDPI journal article supplement (doi:10.3390/ijms17121838), 2016-12-07
Supplement: s1 [file s1]

# Supplementary Materials: Transcriptional Response of Silkworm (*Bombyx mori*) Eggs to O<sub>2</sub> or HCl Treatment

Jing Gong, Sha Tian, Xia Zhou, Huan Yang, Yong Zhu and Yong Hou

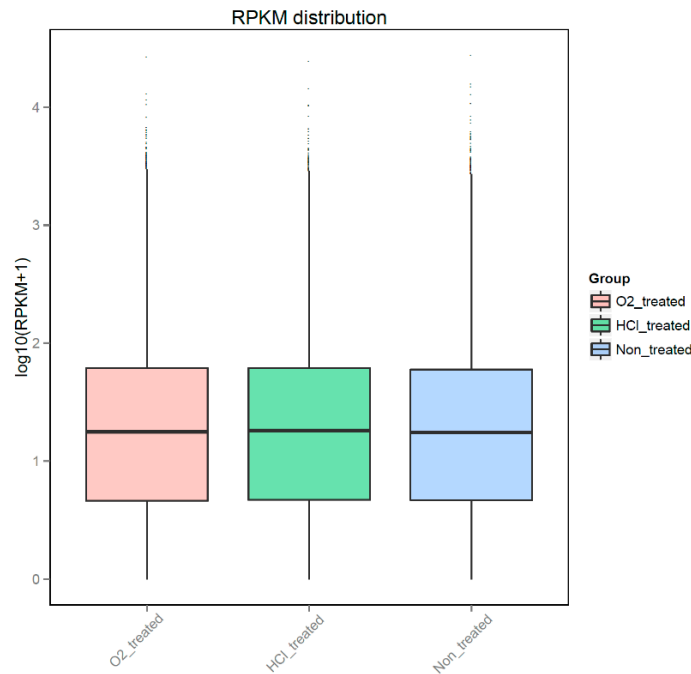

**Figure S1.** Boxplot of the log10 of Reads Per Kilobase of exon model per Million mapped reads (RPKM) values of O2-treated eggs, HCl-treated eggs, and non-treated eggs. The solid horizontal line indicates the median and the box the lower and upper quartiles.

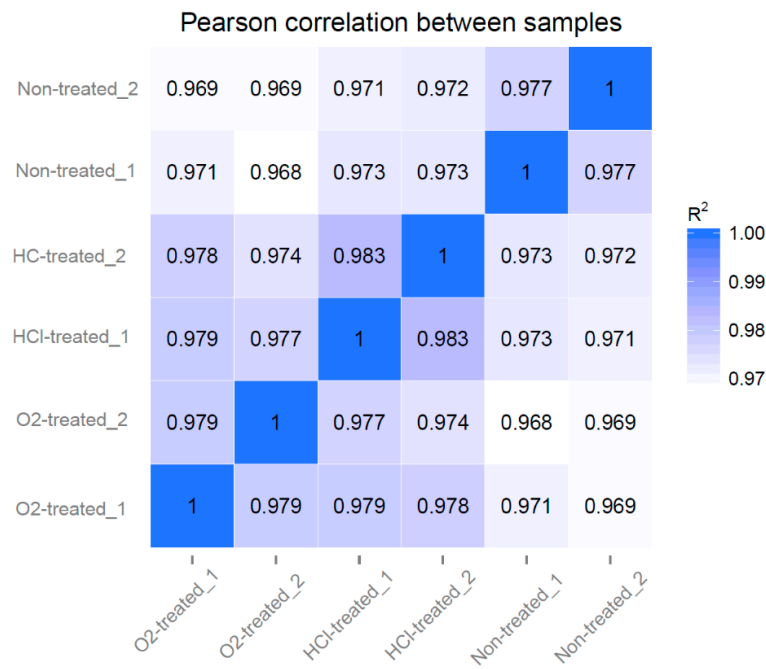

**Figure S2.** Pearson correlation between O2-treated eggs, HCl-treated eggs, and non-treated eggs.cripts/upload/799c28dc699c1a65d0b2753c58894687/5.
